# Supplementary material
Source: Springer Nature journal article supplement (https://www.springermedizin.de/resource/supplementary/13023_2011_386_MOESM1_ESM.pdf/9642220)

Figure 1

**Causes of hypoglycaemia in adults (without diabetes mellitus) including hypoglycaemia linked to IEM (< 0.55 g/L or 3mmol/L (venous sample))**

- Drugs**
- Malicious hypoglycaemia
  - Antibody to insulin
  - Antibody to insulin receptor
  - Alcohol
  - Cortisol (GH) deficiency
  - Sepsis
  - Hepatic, renal or cardiac failure
  - Cachexia
  - IGF-2 or big-IGF-2 by mesenchymal tumors

Usual causes ?

no

Timeline ?

Fasting

Postprandial Hypoglycaemia

Exercise-induced

INSULINOMA ?

REACTIVE HYPOGLYCAEMIA ? (1)

linked to IEM ?

no

linked to IEM ?

Endogenous hyperinsulinism

Endogenous hyperinsulinism

- Glycogenolysis disorder
- Fatty acid oxidation defect
- Gluconeogenesis disorder

Inherited Fructose Intolerance

- Non-Insulinoma pancreatic hypoglycaemia syndrome (NIPHS) (2)
- CDG 1d (1a, 1b in adult ?)

Monocarboxylate transporter 1

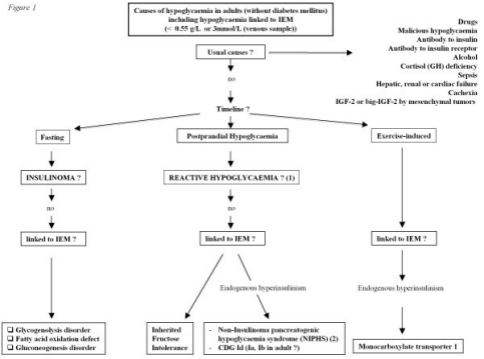

Supplement: MOESM1 [file 9642220]
